# Supplementary material
Source: PubMed Central journal article supplement (PMC3586428)
Supplement: NIHMS402337-supplement-01.pdf [file NIHMS402337-supplement-01.pdf]

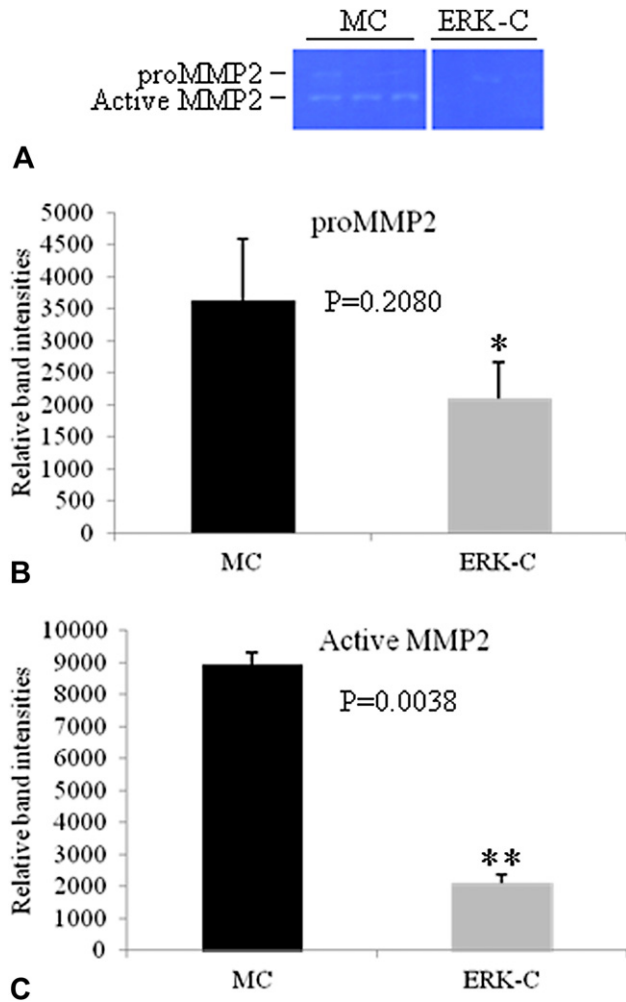

**Supplementary Figure 1.** (A) Zymography and (B, C) densitometric analysis (B,C) showing proMMP2 and active MMP2 in male control wild type (MC) and ERK-1<sup>-/-</sup> (ERK-C) mice. \*p = 0.2080 (proMMP2) and \*\*p < 0.005 (active MMP2), respectively. ERK, extracellular signal-related kinase; MMP, matrix metalloproteinase.
